# PHARMACOLOGICAL PROPERTIES OF VOLTAGE-GATED Na<sup>+</sup> CURRENTS IN MOTOR NEURONES FROM A HYDROZOAN JELLYFISH *POLYORCHIS PENICILLATUS*

J. DAVID SPAFFORD, NIKITA G. GRIGORIEV AND ANDREW N. SPENCER\*

Department of Biological Sciences, The University of Alberta, Edmonton, Alberta, Canada T6G 2E9 and  
Bamfield Marine Station, Bamfield, British Columbia, Canada V0R 1B0

Accepted 21 November 1995

## Summary

The Na<sup>+</sup> current of 'swimming motor neurones' in the hydromedusan *Polyorchis penicillatus* was tetrodotoxin-insensitive. The local anaesthetics lidocaine and procainamide caused partial, non use-dependent blockade of the Na<sup>+</sup> channel. Veratridine produced partial blockade of the Na<sup>+</sup> channel without affecting inactivation. An order of blocking potency of di- and trivalent cations was established as: La<sup>3+</sup> = Zn<sup>2+</sup> = Cd<sup>2+</sup> > Ni<sup>2+</sup> > Mn<sup>2+</sup> = Co<sup>2+</sup> > Ca<sup>2+</sup> > Ba<sup>2+</sup> > Mg<sup>2+</sup>. All these cations, except Ba<sup>2+</sup>, produced depolarizing shifts in the conductance–voltage curves. Even at relatively high concentrations, the dihydropyridines nicardipine, nitrendipine and (+)Bay K 8644 produced only weak blockade of the Na<sup>+</sup> current; while nimodipine, nifedipine and (–)Bay K 8644 were ineffective. Diltiazem and verapamil weakly blocked the Na<sup>+</sup> current in a dose-dependent manner with no evidence

of use-dependence. The calmodulin inhibitors W7 and calmidazolium were ineffective blockers of Na<sup>+</sup> currents. Crude *Conus* venoms and the *Conus* peptides,  $\mu$ -conotoxin GIIA,  $\mu$ O-conotoxin MrVIA,  $\omega$ -conotoxin GVIA and  $\omega$ -conotoxin MVIIC, were without effect. Capsaicin produced rapid, reversible blockade of Na<sup>+</sup> current.

It has been suggested that 'primitive' Na<sup>+</sup> channels could be expected to have pharmacological properties that are intermediate between those of Na<sup>+</sup> and Ca<sup>2+</sup> channels. If such channels exist, the Na<sup>+</sup> channel described here is clearly not one of them.

Key words: jellyfish, *Polyorchis penicillatus*, Na<sup>+</sup> current, motor neurone, pharmacology, tetrodotoxin, local anaesthetics, dihydropyridines, conotoxins, evolution.

## Introduction

Na<sup>+</sup> currents are responsible for the rapid rising phase of action potentials in many excitable cells of coelenterates (cnidarians and ctenophores), such as the hydrozoans *Polyorchis penicillatus* (Anderson, 1979; Spencer and Satterlie, 1981), *Aglantha digitale* (Meech and Mackie, 1993) and *Cladonema* sp. (Anderson and McKay, 1987), the scyphozoan *Cyanea capillata* (Anderson, 1987) and the ctenophore *Mnemiopsis* sp. (Dubas *et al.* 1988). A Na<sup>+</sup>-dependent action potential has been reported from one protozoan species, *Actinocoryne contractilis* (Febvre-Chevalier *et al.* 1986). These Na<sup>+</sup> currents have unconventional pharmacological properties when compared with Na<sup>+</sup> channels in higher metazoans. In particular, the selective Na<sup>+</sup> current blocker tetrodotoxin (TTX), at 10<sup>-8</sup> mol l<sup>-1</sup>, blocks most neuronal Na<sup>+</sup> currents in higher metazoans, from flatworms to vertebrates (Hille, 1992), whereas the Na<sup>+</sup>-dependent action potentials and Na<sup>+</sup> currents that have been examined to date in excitable cells of lower

metazoans and protozoans are minimally affected by TTX, even at concentrations as high as 10<sup>-4</sup> mol l<sup>-1</sup> (Anderson, 1979, 1987; Spencer and Satterlie, 1981; Febvre-Chevalier *et al.* 1986; Anderson and McKay, 1987; Dubas *et al.* 1988; Meech and Mackie, 1993).

The TTX-insensitive Na<sup>+</sup> current recorded from motor neurones in the scyphozoan jellyfish *Cyanea capillata* shows a pharmacological profile that is more similar to that expected of Ca<sup>2+</sup> channels (Anderson, 1987). This finding appears to support the view of Hagiwara (1983) that Ca<sup>2+</sup> channels are phylogenetically more ancient, since they are diverse and are present in the most 'primitive' organisms. Hille (1984) further developed this theory by proposing that high-velocity conduction, and the associated high current density required, could not be supported by Ca<sup>2+</sup> action potentials because of the resulting Ca<sup>2+</sup> toxicity. Selection for Na<sup>+</sup>-permeable channels would therefore be very strong in cells specialized for long-distance, high-frequency signalling. Domain homology

\*Author for correspondence.

between  $\text{Ca}^{2+}$  and  $\text{Na}^{+}$  channels further demonstrates that  $\text{Ca}^{2+}$  channels were the likely immediate ancestral molecules for  $\text{Na}^{+}$  channels (Strong *et al.* 1993). Here, we give an extensive description of the pharmacological properties of a 'primitive' neuronal  $\text{Na}^{+}$  current that assists in determining the phylogenetic and functional relationships between channels carrying the inward currents responsible for propagation of action potentials. In particular, we were interested in determining whether a  $\text{Ca}^{2+}$ -channel-like pharmacology is common to such 'primitive'  $\text{Na}^{+}$  channels. The TTX-insensitive  $\text{Na}^{+}$  current that we describe from motor neurones innervating swimming muscle in *Polyorchis penicillatus* has an unusual pharmacological profile for a neuronal  $\text{Na}^{+}$  current but does not exhibit any specific properties expected for  $\text{Ca}^{2+}$  currents. This is shown by the rank order of sensitivity to blockade by di- and trivalent cations ( $\text{La}^{3+} = \text{Zn}^{2+} = \text{Cd}^{2+} > \text{Ni}^{2+} > \text{Mn}^{2+} = \text{Co}^{2+} > \text{Ca}^{2+} > \text{Ba}^{2+} > \text{Mg}^{2+}$ ) and by the low sensitivity of this current to  $\text{Ca}^{2+}$  channel antagonists (dihydropyridines, diltiazem, verapamil).

## Materials and methods

### Cell culture

Medium-sized jellyfish *Polyorchis penicillatus* (Eschscholtz) (diameter 20–30 mm) were collected in Bamfield and Grappler Inlets (Vancouver Island, British Columbia, Canada) and maintained at approximately 10 °C in flow-through seawater aquaria. Cells were cultured using a method from Przyseznik and Spencer (1989) with slight modifications. Cells were exposed to collagenase for a shorter period (1 h instead of 4–5 h), with agitation. Recordings were made using cell cultures that were no more than 3 days old.

Swimming motor neurones were identified by their large size (soma 30–50  $\mu\text{m}$  long, with processes up to 200  $\mu\text{m}$  long), clear cytoplasm and a nucleus surrounded by membranous structures. They have a characteristic action potential that is identifiable *in vitro* and *in vivo*. Major features of the  $\text{Na}^{+}$  currents, such as time-to-peak, peak current, voltage-dependence, time course of responses and pharmacological responsiveness to drugs, did not change with the age of culture.

### Whole-cell recordings

Whole-cell, tight-seal recordings were made using electrodes of borosilicate glass tubing (TW-150-4, World Precision Instruments), with resistances of 1–2 M $\Omega$  when filled with electrode solutions. Recordings were made at room temperature (approximately 20 °C) with an Axopatch-1D amplifier (Axon Instruments), lowpass-filtered at 3 kHz using a four-pole Bessel filter, and digitized using a Labmaster TL-125 acquisition board (Axon Instruments).

Cultures were viewed under phase contrast with a Nikon Diaphot inverted microscope. Fine alignments of the microelectrode near the cell surface were made using a piezoelectric driver (Burleigh). Stimulus control, data acquisition and analysis were performed using pCLAMP 6.0

software (Axon Instruments) on a 486-based personal computer.

Leakage and capacitive currents were subtracted using  $-P/4$  or  $-P/5$  protocols (pCLAMP 6.0), from a holding potential of  $-80$  mV, before test pulses eliciting active responses were applied. Series resistances ( $R_s$ ) were optimally compensated to minimize voltage errors ( $R_s$  compensation was usually set to values of 80% or more). Membrane capacitance ( $C_m$ ) and  $R_s$  values were obtained by minimizing the capacitive transient in response to a hyperpolarizing voltage step. Only recordings that met the following criteria were used in the analysis. (1) Peak uncompensated current was  $>2$  nA;  $R_s$  was 2–4 M $\Omega$  before compensating for  $R_s$ . (2)  $C_m$  and  $R_s$  did not change by more than 10% before and after drug application, and recovery after drug application was  $>70\%$ . (3) Leakage resistances were in the range 100 M $\Omega$  to 0.5 G $\Omega$ . (4) After series compensation,  $\text{Na}^{+}$  currents reached their peak within 800  $\mu\text{s}$  using test pulses with voltage steps from  $-80$  mV to  $+10$  mV.

Pharmacological agents were microperfused in bath solution dispensed from a manifold with a dead volume of less than 1  $\mu\text{l}$ . Gravity flow was controlled by electromechanical pinch valves and the rate of flow provided complete solution exchange in 2 s. Test pulses were applied every 30 s after drug application. As soon as a current tracing superimposed on the previous trace this was recorded as the experimental trace (saturation), and washing was started. The maximal drug effect was obtained from 30 s to 2 min after drug application.

### Solutions

All culture and recording solutions were filtered through cellulose acetate membrane cartridges with a pore size of 0.2  $\mu\text{m}$  before use. Artificial sea water, contained (in mmol l $^{-1}$ ): NaCl, 376; Na<sub>2</sub>SO<sub>4</sub>, 26; MgCl<sub>2</sub>, 41.4; CaCl<sub>2</sub>, 10; KCl, 8.5; Hepes hemisodium salt, 10; and gentamycin sulphate (50 mg l $^{-1}$ ). The pH of this solution was 7.5.  $\text{Na}^{+}$ -free electrode solutions, containing (in mmol l $^{-1}$ ): MgCl<sub>2</sub>, 2; CaCl<sub>2</sub>, 1; Hepes-free acid, 10; EGTA, 11; CsCl<sub>2</sub>, 400; CsOH, 30; and TEA-Cl, 20, were titrated to pH 7.5 with KOH. Standard bath solutions were calcium-free (in mmol l $^{-1}$ ): NaCl, 395; MgCl<sub>2</sub>, 50; *N*-methylglucamine-HCl, 30; Hepes sodium salt, 10, and were titrated to pH 7.5 with HCl. All outward currents were totally blocked within 5 min after breakthrough, and inward  $\text{Ca}^{2+}$  currents were eliminated since the external solution was  $\text{Ca}^{2+}$ -free. The total divalent ion concentration was kept constant in solutions containing Ba<sup>2+</sup> or Ca<sup>2+</sup> by adjusting the MgCl<sub>2</sub> concentration.

Drugs were purchased from Research Biochemicals International and were prepared daily using bath solution. Stocks of lipophilic compounds were prepared daily in fresh dimethylsulphoxide (DMSO) solution. Final working DMSO concentrations were 0.04–0.5% (v/v). Control responses with DMSO at the above bath concentrations were subtracted from drug responses. Tetrodotoxin was prepared from a stock solution in acetate buffer at pH 4.5 (1 mg ml $^{-1}$ ). Numerical and graphical data are presented as means  $\pm$  S.E.M.

Table 1. Quantitative summary of the effects of drugs on Na<sup>+</sup> current in *Polyorchis penicillatus* motor neurones

| Drug                               | Dose (μmol l <sup>-1</sup> ) | Effect† (%) | N |
|------------------------------------|------------------------------|-------------|---|
| <b>Sodium channel antagonists</b>  |                              |             |   |
| Tetrodotoxin                       | 100                          | 3.26±4.10   | 6 |
| Lidocaine                          | 1000                         | 40.95±1.19  | 9 |
|                                    | 3000                         | 67.67±1.20  | 7 |
| Procainamide                       | 1000                         | 23.58±1.25  | 4 |
| Veratridine*                       | 100                          | 30.18±9.47  | 4 |
| <b>Calcium channel antagonists</b> |                              |             |   |
| <b>Dihydropyridines</b>            |                              |             |   |
| Nicardipine*                       | 40                           | 13.86±2.22  | 9 |
|                                    | 70                           | 26.38±1.15  | 4 |
|                                    | 100                          | 55.24±7.03  | 7 |
| Nitrendipine*                      | 100                          | 16.66±0.60  | 5 |
|                                    | 200                          | 37.35±0.51  | 3 |
| Nimodipine*                        | 100                          | 8.07±4.66   | 3 |
| Nifedipine*                        | 100                          | -0.40±1.79  | 5 |
|                                    | 500                          | 4.38±0.48   | 3 |
| (+)-Bay K 8644*                    | 100                          | 25.29±2.00  | 9 |
| (-)-Bay K 8644*                    | 100                          | -4.63±0.61  | 9 |
| <b>Benzothiazepines</b>            |                              |             |   |
| Diltiazem                          | 50                           | 13.73±4.54  | 3 |
|                                    | 100                          | 29.26±2.64  | 5 |
|                                    | 500                          | 53.23±0.54  | 9 |
|                                    | 1500                         | 64.49±3.82  | 6 |
| <b>Phenylalkylamines</b>           |                              |             |   |
| Verapamil                          | 100                          | 14.97±1.31  | 6 |
|                                    | 500                          | 24.17±3.74  | 4 |
|                                    | 1500                         | 38.12±0.12  | 4 |
| <b>Calmodulin antagonists</b>      |                              |             |   |
| W7                                 | 100                          | 17.49±1.75  | 4 |
| Calmidazolium                      | 20                           | 15.37±1.74  | 9 |
| <b>Non-specific antagonist</b>     |                              |             |   |
| Capsaicin                          | 1                            | 14.70±4.43  | 3 |
|                                    | 5                            | 73.53±8.76  | 3 |
|                                    | 25                           | 89.91±7.62  | 3 |

\*Control responses in the presence of DMSO were subtracted from values recorded in the presence of drugs.

†Percentage change due to drug application from peak current using voltage steps of 10 ms duration to +10 mV from a holding potential of -80 mV.

## Results

The quantitative data for all the chemical agents examined are given in Table 1.

### Effect of classical Na<sup>+</sup> channel blockers and modifiers (TTX, lidocaine, procainamide, veratridine)

The Na<sup>+</sup> current from 'swimming motor neurones' was insensitive to TTX at concentrations from 1 to 100 μmol l<sup>-1</sup> (Fig. 1; Table 1). The local anaesthetics lidocaine and procainamide caused partial, tonic blockade of Na<sup>+</sup> currents at

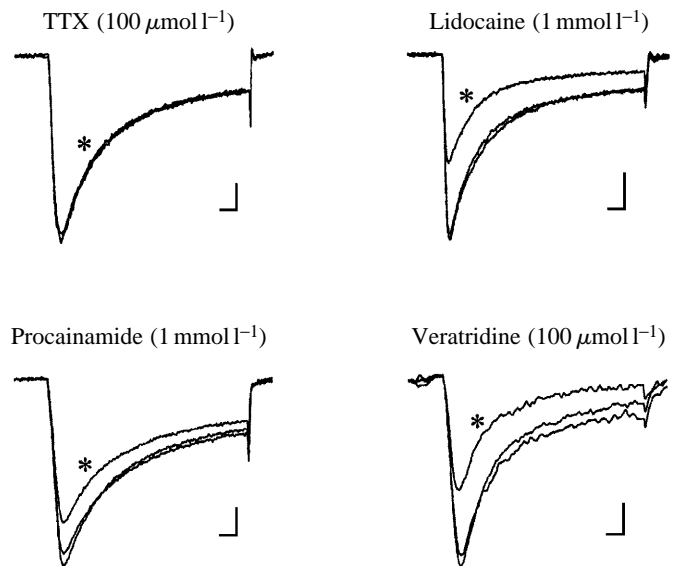

Fig. 1. Effects of Na<sup>+</sup> channel antagonists (TTX, lidocaine, procainamide) and a modifier (veratridine) on Na<sup>+</sup> current. Tracings marked with an asterisk represent drug effects. Tracings are also shown before drug application and after complete washing. In this and all other figures, where the 'before' and 'after' drug application traces do not superimpose, the trace having a smaller peak current is the trace obtained after washing. Responses were generated using voltage steps of 10 ms duration to +10 mV from a holding potential of -80 mV. Vertical and horizontal scale bars represent 1 nA and 1 ms, respectively.

concentrations in the millimolar range and did not exhibit use-dependent blockade (Fig. 1; Table 1). Veratridine, at 100 μmol l<sup>-1</sup>, produced partial blockade of the Na<sup>+</sup> current without affecting inactivation properties (Fig. 1; Table 1).

### Effect of di- and trivalent cations

Fig. 2 shows the effects of La<sup>3+</sup>, Zn<sup>2+</sup>, Cd<sup>2+</sup>, Ni<sup>2+</sup>, Mn<sup>2+</sup> and Co<sup>2+</sup> on Na<sup>+</sup> current at bath concentrations of 3 mmol l<sup>-1</sup> and 1 mmol l<sup>-1</sup>. La<sup>3+</sup>, Zn<sup>2+</sup> and Cd<sup>2+</sup> were the most potent blockers, followed by Ni<sup>2+</sup> then Mn<sup>2+</sup> and Co<sup>2+</sup>. All these cations produced depolarizing shifts in the conductance-voltage curves, with La<sup>3+</sup>, Zn<sup>2+</sup> and Cd<sup>2+</sup> causing the greatest shifts of +10, +12 and +10 mV respectively (data not shown).

Ca<sup>2+</sup> and Ba<sup>2+</sup> were less effective cationic blockers. At concentrations of 10, 30 and 50 mmol l<sup>-1</sup>, Ca<sup>2+</sup> was a more potent blocker than Ba<sup>2+</sup> (Fig. 3). Ca<sup>2+</sup> produced a noticeable depolarizing shift in the current-voltage curve whereas Ba<sup>2+</sup> had little, if any, effect. Charge screening effects (Hille *et al.* 1975) should not apply here, since the concentration of divalent cations was kept constant by substitution with Mg<sup>2+</sup>. The order of blocking potency for all these cations is: La<sup>3+</sup> = Zn<sup>2+</sup> = Cd<sup>2+</sup> > Ni<sup>2+</sup> > Mn<sup>2+</sup> = Co<sup>2+</sup> > Ca<sup>2+</sup> > Ba<sup>2+</sup> > Mg<sup>2+</sup>.

### Effect of Ca<sup>2+</sup> channel antagonists (dihydropyridines, verapamil, diltiazem) and an agonist (-)Bay K 8644

Of the dihydropyridines, nicardipine had the greatest

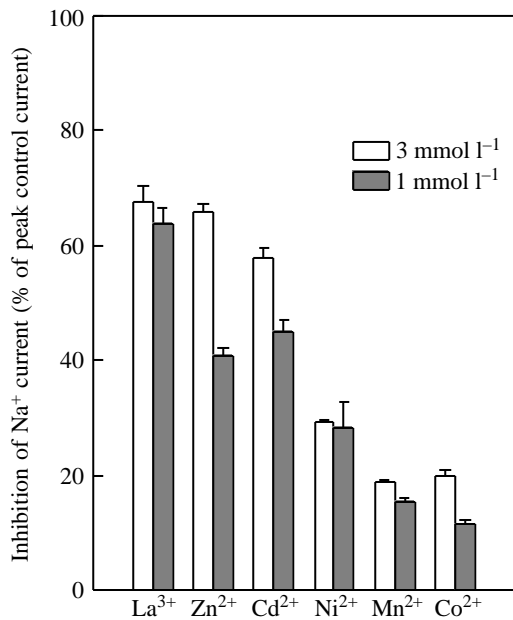

Fig. 2. The inhibitory effects of di- and trivalent cations on Na<sup>+</sup> current at 1 mmol l<sup>-1</sup> (shaded bars) and 3 mmol l<sup>-1</sup> (unshaded bars). Data were obtained from the peak of Na<sup>+</sup> currents generated using voltage steps of 10 ms duration to +10 mV from a holding potential of -80 mV. Bars represent s.e.m. Numbers of cells used at 1 mmol l<sup>-1</sup> and 3 mmol l<sup>-1</sup> respectively: La<sup>3+</sup> (9, 5), Zn<sup>2+</sup> (10, 12), Cd<sup>2+</sup> (4, 7), Ni<sup>2+</sup> (5, 4), Mn<sup>2+</sup> (5, 5), Co<sup>2+</sup> (6, 5).

inhibitory effect (Table 1), but even at 70 μmol l<sup>-1</sup> it only produced a 26% decrease in peak current (Fig. 4; Table 1). Nitrendipine at 100 μmol l<sup>-1</sup> reduced the current by 17%, while nimodipine and nifedipine at 100 μmol l<sup>-1</sup> had no significant effect (when the inhibitory effect of DMSO in the vehicle solution was taken into account). The antagonistic enantiomer (+)Bay K 8644, at 100 μmol l<sup>-1</sup>, inhibited peak Na<sup>+</sup> current by 25%, while the agonistic (-) enantiomer had no significant effect (Fig. 4; Table 1). The solubilising agent DMSO at 0.1% (v/v) also inhibited the current by approximately 10%.

Diltiazem and verapamil blocked the Na<sup>+</sup> current in a dose-

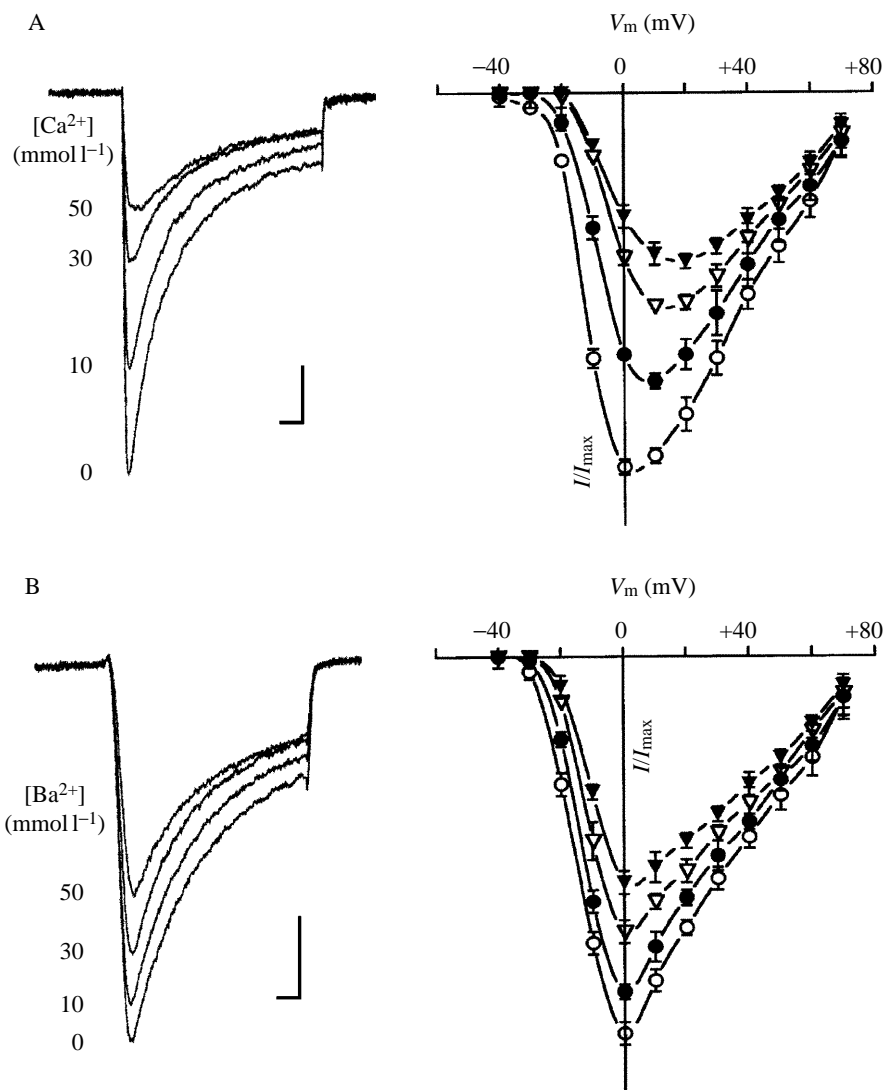

Fig. 3. Effects of 10, 30 and 50 mmol l<sup>-1</sup> Ca<sup>2+</sup> and Ba<sup>2+</sup> on Na<sup>+</sup> current. Left-hand side: Na<sup>+</sup> current tracings in Ca<sup>2+</sup> (A) and Ba<sup>2+</sup> (B) solutions generated using voltage steps of 10 ms duration to +10 mV from a holding potential of -80 mV. Right-hand side: current-voltage relationships using Ca<sup>2+</sup> (A) and Ba<sup>2+</sup> (B) at concentrations of 0 mmol l<sup>-1</sup> (open circles), 10 mmol l<sup>-1</sup> (filled circles), 30 mmol l<sup>-1</sup> (open triangles) and 50 mmol l<sup>-1</sup> (filled triangles). Currents are normalised to peak control currents. Responses were generated using voltage steps from -40 mV to +70 mV in 10 mV increments. The holding potential was -80 mV. Vertical and horizontal scale bars represent 1 nA and 1 ms, respectively. Error bars represent s.e.m.

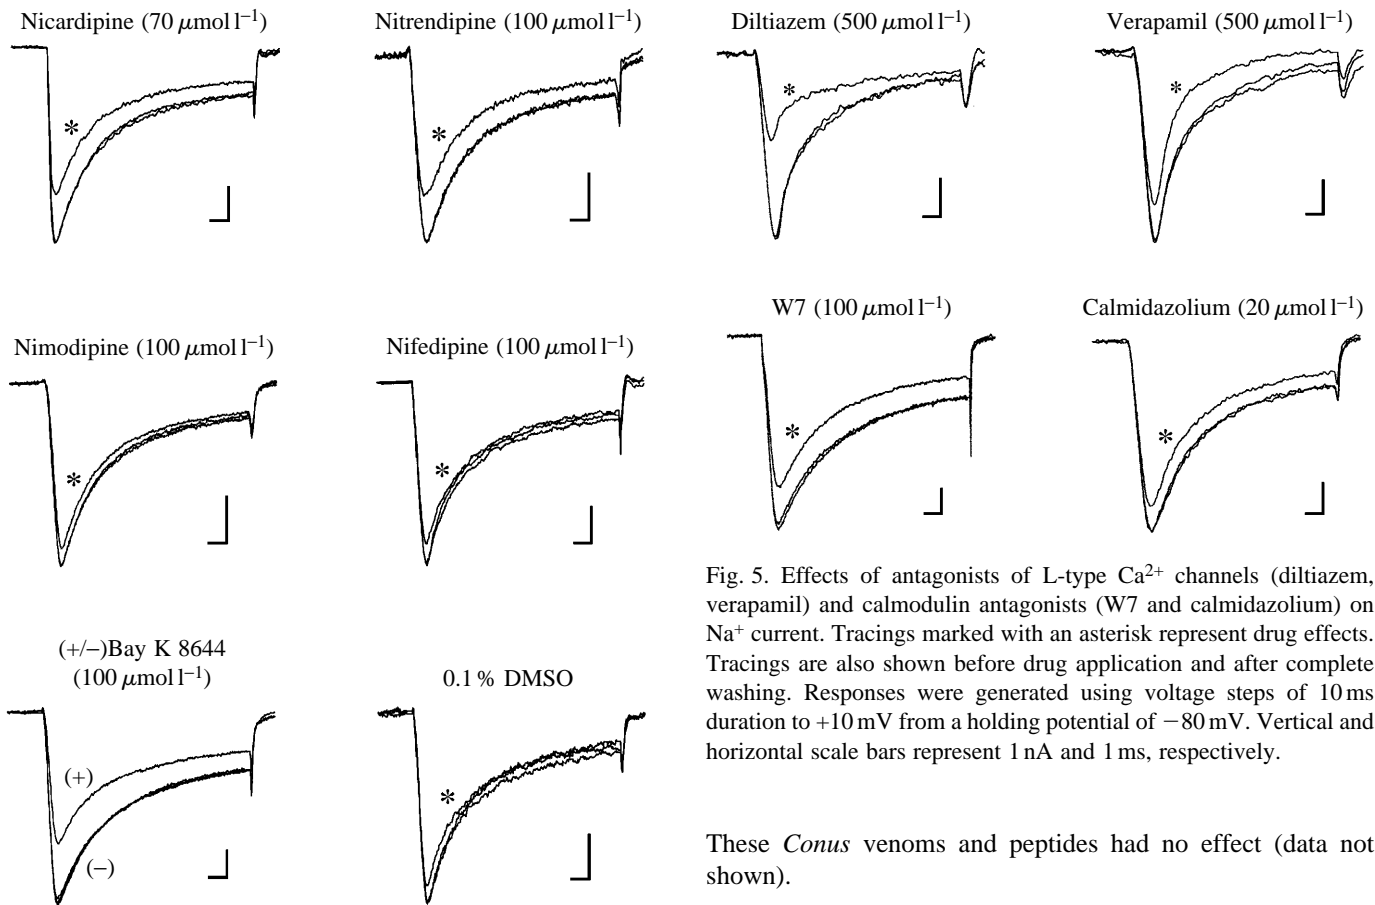

Fig. 4. Effects of dihydropyridines and the solubilizing agent dimethylsulphoxide (DMSO) on Na<sup>+</sup> current. Tracings marked with an asterisk represents drug effects. Tracings are also shown before drug application and after complete washing. For Bay K 8644, the + and - enantiomers are marked; note that the effect of (-)Bay K 8644 was no different from the control or wash traces for both enantiomers. Responses were generated using voltage steps of 10 ms duration to +10 mV from a holding potential of -80 mV. Vertical and horizontal scale bars represent 1 nA and 1 ms, respectively.

dependent manner. At 500 μmol l<sup>-1</sup>, they produced 53% and 24% decreases, respectively, in current amplitude (Fig. 5; Table 1). There was no evidence of use-dependent blockade by verapamil.

#### Effect of the calmodulin inhibitors W7 and calmidazolium

Neither W7 (100 μmol l<sup>-1</sup>) nor calmidazolium (20 μmol l<sup>-1</sup>) was a very effective blocker of Na<sup>+</sup> current (Fig. 5; Table 1).

#### Effects of *Conus* neurotoxins

The following *Conus* venoms and peptides were applied to motor neurones: crude venom (1 mg ml<sup>-1</sup>) from *C. quercinus*, *C. textile* and *C. geographicus*; purified peptides, μ-conotoxin GIIA (1 μmol l<sup>-1</sup>), μO-conotoxin MrVIA (0.5 μmol l<sup>-1</sup>) and the ω-conotoxins GVIA (1 μmol l<sup>-1</sup>) and MVIIC (1 μmol l<sup>-1</sup>).

Fig. 5. Effects of antagonists of L-type Ca<sup>2+</sup> channels (diltiazem, verapamil) and calmodulin antagonists (W7 and calmidazolium) on Na<sup>+</sup> current. Tracings marked with an asterisk represent drug effects. Tracings are also shown before drug application and after complete washing. Responses were generated using voltage steps of 10 ms duration to +10 mV from a holding potential of -80 mV. Vertical and horizontal scale bars represent 1 nA and 1 ms, respectively.

These *Conus* venoms and peptides had no effect (data not shown).

#### Effect of capsaicin

The only drug examined to date which was active at comparatively low concentrations was capsaicin (*trans*-8-methyl-*N*-vanillyl-6-nonamide), which produced a rapid and noticeable blockade of Na<sup>+</sup> current at a concentration of 5 μmol l<sup>-1</sup> (Fig. 6A; Table 1). At 25 μmol l<sup>-1</sup>, the current was reduced by 90%. However, the effect of capsaicin is not specific since outward K<sup>+</sup> currents were also strongly inhibited at higher concentrations (300 μmol l<sup>-1</sup>) (Fig. 6B).

#### Discussion

On the basis of their susceptibility to tetrodotoxin, three classes of Na<sup>+</sup> currents have been described: TTX-insensitive (>100 μmol l<sup>-1</sup>), TTX-resistant (1–10 μmol l<sup>-1</sup>) and TTX-sensitive (nanomolar range) (Anderson, 1987). Our data clearly show that the Na<sup>+</sup> current of jellyfish swimming motor neurones can be classified as TTX-insensitive since concentrations as high as 100 μmol l<sup>-1</sup> did not block these currents. These data confirm the finding of Anderson (1979) that propagation of action potentials in the swimming motor neurone network of *Polyorchis penicillatus* is not affected by TTX at concentrations up to 125 μmol l<sup>-1</sup>. An analogue of TTX, saxitoxin, at 25 μmol l<sup>-1</sup> also failed to block Na<sup>+</sup> currents (Przysieznik, 1993).

TTX-insensitive Na<sup>+</sup> currents have been described in other cnidarian and ctenophoran cells (Anderson, 1987; Anderson

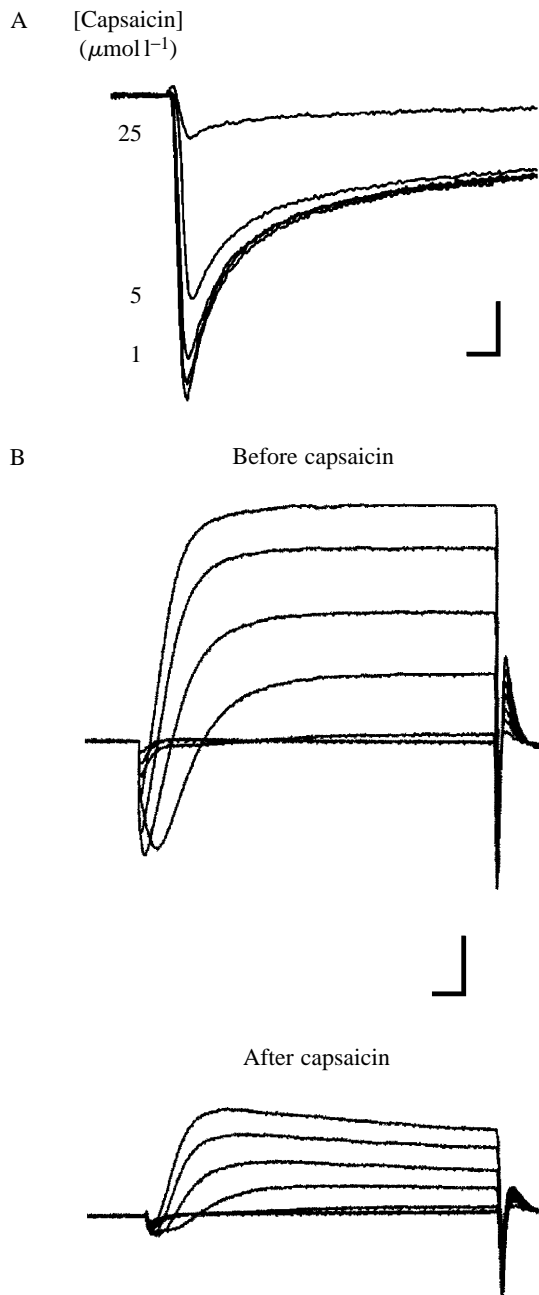

Fig. 6. Effect of capsaicin on  $\text{Na}^+$  current. (A) Effects of 1, 5 and  $25 \mu\text{mol l}^{-1}$  capsaicin on  $\text{Na}^+$  current. Tracings are also shown before drug application and after complete washing. Responses were generated using voltage steps of 10 ms duration to  $+10 \text{ mV}$  from a holding potential of  $-80 \text{ mV}$ . (B) Effects of capsaicin ( $300 \mu\text{mol l}^{-1}$ ) on total ionic current. Upper traces: before application of capsaicin. Lower traces: after application of capsaicin. Responses were generated using voltage steps from  $-40 \text{ mV}$  to  $+60 \text{ mV}$  in  $20 \text{ mV}$  increments. The holding potential was  $-80 \text{ mV}$ . Vertical and horizontal scale bars represent  $1 \text{ nA}$  and  $1 \text{ ms}$ , respectively.

and McKay, 1987; Dubas *et al.* 1988; Meech and Mackie, 1993), while the only truly voltage-gated  $\text{Na}^+$  current recorded from a protozoan (*Actinocoryne contractilis*) is also TTX-insensitive (Febvre-Chevalier *et al.* 1986). Thus, although TTX

insensitivity or resistance is relatively rare throughout the protostome and deuterostome lineages, it appears to be a common feature of lower metazoan  $\text{Na}^+$  channels. However, we cannot yet say whether ancestral  $\text{Na}^+$  channels were TTX-sensitive or not.

In mammals, TTX-resistant channels have been described from cardiac muscle cells, embryonic skeletal muscle and denervated skeletal muscle (Cohen *et al.* 1981; Gonoï *et al.* 1985; Pappone, 1980). These TTX-resistant channels have a characteristic order of potency for di- and trivalent cation blockade. For example, in canine Purkinje fibre  $\text{Na}^+$  channels this order is  $\text{Zn}^{2+} > \text{Cd}^{2+} = \text{La}^{3+} > \text{Ni}^{2+} \cong \text{Mn}^{2+} > \text{Co}^{2+} > \text{Ba}^{2+} = \text{Mg}^{2+} = \text{Ca}^{2+}$  (Hanck and Sheets, 1992), which is very similar to the order of potency ( $\text{La}^{3+} = \text{Zn}^{2+} = \text{Cd}^{2+} > \text{Ni}^{2+} > \text{Mn}^{2+} = \text{Co}^{2+} > \text{Ca}^{2+} > \text{Ba}^{2+} > \text{Mg}^{2+}$ ) observed in this study. The TTX-insensitive  $\text{Na}^+$  current recorded from neurones of the *Cyanea capillata* motor nerve-net (Anderson, 1987) showed a similar  $\text{Cd}^{2+}$  sensitivity to that recorded here for *Polyorchis penicillatus* motor neurones. It should be noted that  $\text{Cd}^{2+}$ , at much lower concentrations ( $0.3 \text{ mmol l}^{-1}$ ) than were used in this study, completely blocks  $\text{Ca}^{2+}$  currents in the same *Polyorchis penicillatus* neurones as were used in this study (Przysieznik and Spencer, 1992).  $\text{Ca}^{2+}$  current in *Cyanea capillata* motor neurones was blocked by  $2 \text{ mmol l}^{-1}$   $\text{Cd}^{2+}$  (Anderson, 1989).

The high susceptibility of TTX-resistant channels to blockade by  $\text{Zn}^{2+}$  and  $\text{Cd}^{2+}$  is not apparent in mammalian brain and skeletal muscle TTX-sensitive channels (Frelin *et al.* 1986). Thus, the region that is responsible for high sensitivity to TTX also produces a lower  $\text{Zn}^{2+}$  and  $\text{Cd}^{2+}$  binding affinity. Structure/function analyses of the  $\text{Na}^+$  channel subunit have shown that, in short segment 2 of domain I, a critical cysteine residue in cardiac  $\text{Na}^+$  channels and a tyrosine or phenylalanine residue in a similar position in brain and skeletal  $\text{Na}^+$  channels are critical residues of the TTX receptor site (Sather *et al.* 1994). A tyrosine to cysteine mutation in skeletal muscle  $\text{Na}^+$  channels and a phenylalanine to cysteine mutation in brain  $\text{Na}^+$  channels substantially lowers TTX sensitivity and creates a high-affinity binding site for  $\text{Zn}^{2+}$  and  $\text{Cd}^{2+}$  (Backx *et al.* 1992; Heinemann *et al.* 1992a).

$\text{Ca}^{2+}$  blocked *Polyorchis penicillatus* neuronal  $\text{Na}^+$  currents (Fig. 3) in a dose-dependent fashion, at concentrations similar to those reported for canine Purkinje fibre  $\text{Na}^+$  currents (Hanck and Sheets, 1992). At  $10 \text{ mmol l}^{-1}$   $\text{Ca}^{2+}$ , which is the normal extracellular concentration of  $\text{Ca}^{2+}$  in jellyfish, there was a 31% blockade of  $\text{Na}^+$  current at  $0 \text{ mV}$  (Fig. 3).  $\text{Ca}^{2+}$  blockade of  $\text{Na}^+$  current under normal physiological conditions presumably occurs in many marine invertebrates. Despite extreme differences in the extracellular fluid concentrations of  $\text{Ca}^{2+}$  in marine ( $10 \text{ mmol l}^{-1}$ ) and terrestrial ( $1\text{--}2 \text{ mmol l}^{-1}$ ) animals, the relative affinity of  $\text{Na}^+$  channels for  $\text{Ca}^{2+}$  appears to remain the same. Unlike  $\text{Ba}^{2+}$ ,  $\text{Ca}^{2+}$  caused a significant depolarizing shift (approximately  $20 \text{ mV}$ ) in the current-voltage relationship (Fig. 3A), which indicates that  $\text{Ca}^{2+}$  binds with higher affinity to a region close to the voltage sensor than does  $\text{Ba}^{2+}$  or  $\text{Mg}^{2+}$ . Under the experimental

conditions used here (constant concentration of divalent cations), this *I/V* shift cannot be explained by charge screening. Worley *et al.* (1992) have shown that Ca<sup>2+</sup> binds to the channel itself and does not interact with the surrounding lipid. The presence of Ca<sup>2+</sup> binding sites on Na<sup>+</sup> channels may be an evolutionary marker of the common ancestry of Ca<sup>2+</sup> and Na<sup>+</sup> channels.

Although the local anaesthetics lidocaine and procainamide produced partial blockade of Na<sup>+</sup> current in *Polyorchis penicillatus* neurones, there was no evidence of the use-dependent blockade typical of the mode of action of these drugs in most Na<sup>+</sup> channels (Hille, 1977). This result contrasts with the finding that the Na<sup>+</sup> current in *Cyanea capillata* motor neurones shows use-dependent blockade by lidocaine (Anderson, 1987). Similarly, veratridine, which modifies inactivation in most Na<sup>+</sup> channels (Hille, 1992), produced partial blockade, but did not affect inactivation kinetics either in *Polyorchis penicillatus* neurones (this study) or in *Cyanea capillata* motor neurones (Anderson, 1987). Batrachotoxin, alpha-scorpion venom and sea anemone toxin, which are also modifiers of inactivation, were also ineffective in *Cyanea capillata* neurones (Anderson, 1987). Since all the above-mentioned drugs act at sites outside the mouth of the channel, it appears that the TTX binding region is strongly conserved but that other binding sites are less conserved. A *Conus* toxin,  $\mu$ O-conotoxin MrVIA (which, although being a Na<sup>+</sup> channel ligand has structural similarities to the Ca<sup>2+</sup> channel blocking  $\omega$ - and  $\delta$ -conotoxins; McIntosh *et al.* 1995), was without effect. In contrast,  $\mu$ O-conotoxin MrVIA blocks TTX-insensitive Na<sup>+</sup> channels in *Aplysia californica* neurones at 350 nmol l<sup>-1</sup> (McIntosh *et al.* 1995).

The only pharmacological agent shown to have a relatively potent blocking effect on the Na<sup>+</sup> current was capsaicin (Fig. 6A); however, the effect was non-specific as outward currents were also affected (Fig. 6B). Capsaicin has been reported to block both Na<sup>+</sup> and K<sup>+</sup> channels in dorsal root ganglion neurones of the guinea pig and chicken where, despite its lipophilicity, it was shown to act from the outside (Petersen *et al.* 1987). Our own unpublished data also indicate that capsaicin has no effect when applied intracellularly to *Polyorchis penicillatus* motor neurones.

The Ca<sup>2+</sup> channel antagonists (dihydropyridines, verapamil, diltiazem) were not effective blockers of Na<sup>+</sup> current (Figs 4, 5) in the concentration range (20 nmol l<sup>-1</sup> to 50  $\mu$ mol l<sup>-1</sup>) that is normally effective for L-type Ca<sup>2+</sup> channels (Hille, 1992). At higher concentrations, these antagonists are known to lose their specificity for Ca<sup>2+</sup> channels and begin to block Na<sup>+</sup> channels (Hille, 1992). Even at the high concentrations used here, of all the dihydropyridines examined, only nifedipine, (+)Bay K 8644 and nitrendipine showed any blocking effect (Fig. 4). The related compounds nimodipine and nifedipine showed no blocking effect (Fig. 4). On the basis of the blocking action of nifedipine and verapamil on the Na<sup>+</sup> current in neurones of the subumbrellar motor network of *Cyanea capillata*, Anderson (1989) suggested that the Na<sup>+</sup> channel responsible has the pharmacology of a Ca<sup>2+</sup> channel.

Drugs known to be calmodulin inhibitors, W7 and calmidazolium, have been shown to inhibit Ca<sup>2+</sup> currents (Caulfield *et al.* 1991) and Na<sup>+</sup> currents (Ichikawa *et al.* 1991). Neither of these drugs had substantial blocking effects on *Polyorchis penicillatus* Na<sup>+</sup> currents (Fig. 5).

Because the majority of dihydropyridines and other specific antagonists of L-type Ca<sup>2+</sup> channels were ineffective blockers of the *Polyorchis penicillatus* Na<sup>+</sup> channel, we are obliged to conclude that the pharmacological profile of this channel has no similarity to the profile expected for Ca<sup>2+</sup> channels. Since it has been shown that a Na<sup>+</sup> channel can become Ca<sup>2+</sup>-selective after the mutation of one amino acid in two domains of the pore region (Heinemann *et al.* 1992b), it is attractive to suppose that hybrid Ca<sup>2+</sup>-Na<sup>+</sup> channels might be present in lower metazoans. Nevertheless, despite the unusual Na<sup>+</sup> pharmacological profile of this *Polyorchis penicillatus* motor neuronal channel, it is clear that this particular channel is not likely to have a hybrid molecular structure.

This study was supported by a Natural Sciences and Engineering Research Council of Canada Research Grant to A.N.S. D.S. has been supported by an Alberta Heritage Foundation for Medical Research Scholarship. We especially thank Drs B. M. Olivera and J. M. McIntosh at the University of Utah for supplying *Conus* venoms and purified toxins. Research Biochemicals International provided invaluable technical information concerning drugs. The staff at Bamfield Marine Station provided assistance in collecting and holding jellyfish.

## References

- ANDERSON P. A. V. (1979). Ionic basis of action potentials and bursting activity in the hydromedusan jellyfish, *Polyorchis penicillatus*. *J. exp. Biol.* **78**, 299–302.
- ANDERSON, P. A. V. (1987). Properties and pharmacology of a TTX-insensitive Na<sup>+</sup> current in neurones of the jellyfish *Cyanea capillata*. *J. exp. Biol.* **133**, 231–248.
- ANDERSON, P. A. V. (1989). Ionic currents of the Scyphozoa. In *Evolution of the First Nervous Systems*, vol. 188 (ed. P. A. V. Anderson), pp. 267–280. New York: Plenum Press.
- ANDERSON, P. A. V. AND MCKAY, M. C. (1987). The electrophysiology of cnidocytes. *J. exp. Biol.* **133**, 215–230.
- BACKX, P. J., YUE, D. T., LAWRENCE, J. H., MARBAN, E. AND TOMASELLI, G. F. (1992). Molecular localization of an ion-binding site within the pore of mammalian sodium channels. *Science* **257**, 248–251.
- CAULFIELD, M. P., ROBBINS, J., SIM, J. A., BROWN, D. A., MACNEIL, S. AND BLACKBURN, G. M. (1991). The naphthalenesulphonamide calmodulin antagonist W7 and its 5-iodo-1-C8 analogue inhibit potassium and calcium currents in NG108-15 neuroblastoma  $\times$  glioma cells in a manner possibly unrelated to their antagonism of calmodulin. *Neurosci. Lett.* **125**, 57–61.
- COHEN, C. J., BEAN, B. P., COLATSKY, T. J. AND TSIEN, R. W. (1981). Tetrodotoxin block of sodium channels in rabbit Purkinje fibers: interaction between toxin binding and channel gating. *J. gen. Physiol.* **78**, 383–411.
- DUBAS, F., STEIN, P. G. AND ANDERSON, P. A. V. (1988). Ionic currents

- of smooth muscle cells isolated from the ctenophore *Mnemiopsis*. *Proc. R. Soc. Lond. B* **233**, 99–121.
- FEBVRE-CHEVALIER, C., BILBAUT, A., BONE, Q. AND FEBVRE, J. (1986). Sodium–calcium action potential associated with contraction in the heliozoan *Actinocoryne contractilis*. *J. exp. Biol.* **122**, 177–192.
- FRELIN, C., CONGNARD, C., VIGNE, P. AND LAZDUNSKI, M. (1986). Tetrodotoxin-sensitive and tetrodotoxin-resistant Na<sup>+</sup> channels differ in their sensitivity to Cd<sup>2+</sup> and Zn<sup>2+</sup>. *Eur. J. Pharmac.* **122**, 245–250.
- GONOI, T., SHERMAN, S. J. AND CATTERALL, W. A. (1985). Voltage-clamp analysis of tetrodotoxin-sensitive and -insensitive sodium channels in rat muscle cells developing *in vitro*. *J. Neurosci.* **5**, 2559–2564.
- HAGIWARA, S. (1983). Diversity of Na and Ca channels. In *Membrane Potential-Dependent Ion Channels in Cell Membrane: Phylogenetic and Developmental Approaches*. Distinguished Lecture Series. *Soc. gen. Physiol.* **3**, 49–59. New York: Raven Press.
- HANCK, D. A. AND SHEETS, M. F. (1992). Extracellular divalent and trivalent cation effects on sodium current kinetics in single canine cardiac Purkinje cells. *J. Physiol., Lond.* **454**, 267–298.
- HEINEMANN, S. H., TERLAU, H. AND IMOTO, K. (1992a). Molecular basis for pharmacological differences between brain and cardiac sodium channels. *Pflügers Arch.* **422**, 90–92.
- HEINEMANN, S. H., TERLAU, H., STUHMER, W., IMOTO, K. AND NUMA, S. (1992b). Calcium channel characteristics conferred on the sodium channel by single mutations. *Nature* **356**, 441–443.
- HILLE, B. (1977). Local anesthetics: Hydrophilic and hydrophobic pathways for the drug–receptor reaction. *J. gen. Physiol.* **69**, 497–515.
- HILLE, B. (1984). Evolution and diversity. In *Ionic Channels of Excitable Membranes*, 1st edition, pp. 371–383. Sunderland, MA: Sinauer Associates.
- HILLE, B. (1992). Evolution and diversity. In *Ionic Channels of Excitable Membranes*, 2nd edition, pp. 525–544. Sunderland, MA: Sinauer Associates.
- HILLE, B., WOODHULL, A. M. AND SHAPIRO, B. I. (1975). Negative surface charge near sodium channels of nerve: Divalent ions, monovalent ions and pH. *Phil. Trans. R. Soc. Lond. B* **270**, 301–318.
- ICHIKAWA, M., URAYAMA, M. AND MATSUMOTO, G. (1991). Anticalmodulin drugs block the sodium gating current of squid giant axons. *J. Membr. Biol.* **120**, 211–222.
- MCINTOSH, J. M., HASSON, A., SPIRA, M. E., GRAY, W. R., LI, W., MARSH, M., HILLYARD, D. R. AND OLIVERA, B. M. (1995). A new family of conotoxins that blocks voltage-gated sodium channels. *J. biol. Chem.* (in press).
- MEECH, R. W. AND MACKIE, G. O. (1993). Ionic currents in giant motor axons of the jellyfish, *Aequorea victoria*. *J. Neurophysiol.* **69**, 884–893.
- PAPPONE, P. A. (1980). Voltage-clamp experiments in normal and denervated mammalian skeletal muscle. *J. Physiol., Lond.* **306**, 377–410.
- PETERSEN, M., PIERAU, F. K. AND WEYRICH, M. (1987). The influence of capsaicin on membrane currents in dorsal root ganglion neurones of guinea-pig and chicken. *Pflügers Arch.* **409**, 403–410.
- PRZYSIEZNAK, J. P. (1993). Voltage-activated currents in identified motor neurons from the hydromedusa *Polyorchis penicillatus*. PhD thesis, University of Alberta.
- PRZYSIEZNAK, J. P. AND SPENCER, A. N. (1989). Primary culture of identified neurones from a cnidarian. *J. exp. Biol.* **142**, 97–113.
- PRZYSIEZNAK, J. P. AND SPENCER, A. N. (1992). Voltage-activated calcium currents in identified neurons from a hydrozoan jellyfish, *Polyorchis penicillatus*. *J. Neurosci.* **12**, 2065–2078.
- SATHER, W. A., YANG, J. AND TSIEN, R. W. (1994). Structural basis of ion channel permeation and selectivity. *Curr. Opin. Neurobiol.* **4**, 313–323.
- SPENCER, A. N. AND SATTERLIE, R. A. (1981). The action potential and contraction in subumbrellar swimming muscle of *Polyorchis penicillatus* (Hydromedusae). *J. comp. Physiol.* **144**, 401–407.
- STRONG, M., CHANDY, K. G. AND GUTMAN, G. A. (1993). Molecular evolution of voltage-sensitive ion channel genes: on the origins of electrical excitability. *Molec. Biol. Evol.* **10**, 221–242.
- WORLEY III, J. F., FRENCH, R. J., PAILTHORPE, B. A. AND KRUEGER, B. K. (1992). Lipid surface charge does not influence conductance or calcium block of single sodium channels in planar bilayers. *Biophys. J.* **61**, 1353–1363.
